# Supplementary material for: Epidemiology and Economic Burden of Chikungunya: A Systematic Literature Review
Source: MDPI journal article supplement (doi:10.3390/tropicalmed8060301), 2023-05-31
Supplement: s1 [file s1]

Tables S3: Quality assessment of included studies

| NEWCASTLE – OTTAWA: Escala de Acesso de Qualidade                        |                    |                         |                           |                 |                       |                      |                           |                         |                           |                         |
|--------------------------------------------------------------------------|--------------------|-------------------------|---------------------------|-----------------|-----------------------|----------------------|---------------------------|-------------------------|---------------------------|-------------------------|
|                                                                          | Doran et al (2022) | Gerarsin P et al (2011) | Bertolotti et al A (2020) | Chopra A (2012) | Gordon A et al (2018) | Moyen N et al (2011) | Soumahoro Mk et al (2009) | Gerardin P et al (2011) | Bertolotti A et al (2020) | Couzigou B et al (2018) |
| Representativeness of the Exposed Cohort                                 | No                 | Yes                     | YES                       | yes             | yes                   | yes                  | yes                       | yes                     | yes                       | yes                     |
| Selection of the Non-Exposed Cohort                                      | No                 | yes                     | yes                       | yes             | yes                   | yes                  | yes                       | yes                     | yes                       | yes                     |
| Ascertainment of Exposure                                                | Yes                | yes                     | yes                       | yes             | yes                   | yes                  | yes                       | yes                     | yes                       | yes                     |
| Demonstration That Outcome of Interest Was Not Present at Start of Study | Yes                | yes                     | yes                       | no              | no                    | no                   | yes                       | yes                     | yes                       | yes                     |
| Comparability of Cohorts on the Basis of the Design or Analysis          | Yes                | No                      | no                        | yes             | no                    | no                   | yes                       | yes                     | yes                       | yes                     |
| Assessment of Outcome                                                    | Yes                | yes                     | yes                       | yes             | yes                   | yes                  | yes                       | yes                     | yes                       | yes                     |
| Was Follow-Up Long Enough for Outcomes to Occur                          | Yes                | yes                     | yes                       | yes             | yes                   | yes                  | yes                       | yes                     | yes                       | yes                     |
| Adequacy of Follow Up of Cohorts                                         | NO                 | yes                     | yes                       | no              | yes                   | no                   | yes                       | yes                     | yes                       | yes                     |

[illegible]

|                              |     |     |     |     |                |                |     |     |     |
|------------------------------|-----|-----|-----|-----|----------------|----------------|-----|-----|-----|
| Ramachandran V, et al (2012) | yes | yes | yes | yes | yes            | yes            | yes | yes | 8/8 |
| Kinimi E, et al. (2018)      | yes | yes | yes | yes | Not applicable | Not applicable | yes | yes | 6/8 |
| Luvai EAC et al. (2021)      | yes | yes | yes | yes | yes            | yes            | yes | yes | 8/8 |
| Joshi P, et al. (2020)       | yes | yes | yes | yes | Not applicable | Not applicable | yes | yes | 6/8 |
| Mathew AJ, et al. (2011)     | yes | yes | yes | yes | yes            | yes            | yes | yes | 8/8 |
| Mwanyika GO, et al. (2021)   | yes | yes | yes | yes | yes            | yes            | yes | yes | 8/8 |
| Mease LE, et al. (2011)      | yes | yes | yes | yes | yes            | yes            | yes | yes | 8/8 |
| Khongwichit S, et al. (2021) | yes | yes | yes | yes | Not applicable | Not applicable | yes | yes | 6/8 |
| Simião AR et al. (2019)      | yes | yes | yes | yes | Not applicable | Not applicable | yes | yes | 6/8 |
| Renault P, et al. (2007)     | yes | yes | yes | yes | Not applicable | Not applicable | yes | yes | 6/8 |

|                           |     |     |     |     |                |                |     |     |     |
|---------------------------|-----|-----|-----|-----|----------------|----------------|-----|-----|-----|
| Khatun S, et al (2015)    | yes | yes | yes | yes | Not applicable | Not applicable | yes | yes | 6/8 |
| Nicacio JM, et al. (2021) | yes | yes | yes | yes | Not applicable | Not applicable | yes | yes | 6/8 |
| Hertz JT, et al. (2012)   | yes | yes | yes | yes | Not applicable | Not applicable | yes | yes | 6/8 |
| Ray P, et al. (2012)      | yes | yes | yes | yes | Not applicable | Not applicable | yes | yes | 6/8 |
| Hossain MS, et al. (2018) | yes | yes | yes | yes | yes            | yes            | yes | yes | 8/8 |
| Huits R, et al. (2018)    | yes | yes | yes | yes | yes            | yes            | yes | yes | 8/8 |
| Henry M. (2017)           | yes | yes | yes | yes | Not applicable | Not applicable | yes | yes | 6/8 |
| Barr KL, et al. (2018)    | yes | yes | yes | yes | unclear        | unclear        | yes | no  | 5/8 |
| Aubry M et al. (2020)     | no  | no  | yes | yes | no             | no             | yes | yes | 4/8 |
| Dorléans F, et al. (2018) | yes | yes | yes | yes | no             | no             | yes | yes | 6/8 |
| Barreto, MCA et al.       | no  | yes | yes | yes | Not            | Not            | yes | yes | 5/8 |

|                                |     |     |     |     |            |            |     |                |     |
|--------------------------------|-----|-----|-----|-----|------------|------------|-----|----------------|-----|
| (2021)                         |     |     |     |     | applicable | applicable |     |                |     |
| Ekong PS, et al. (2022)        | yes | no  | yes | yes | no         | yes        | yes | yes            | 6/8 |
| Chis Ster I, et al. (2020)     | yes | yes | yes | yes | yes        | yes        | yes | yes            | 8/8 |
| Teixeira MG, et al. (2021)     | yes | yes | yes | yes | yes        | yes        | yes | yes            | 8/8 |
| Economopoulou A, et al. (2009) | yes | yes | yes | yes | yes        | yes        | yes | yes            | 8/8 |
| Vongpunsawad S, et al. (2017)  | yes | yes | yes | yes | no         | no         | yes | yes            | 6/8 |
| Endale A, et al. (2020)        | yes | yes | yes | yes | yes        | yes        | yes | yes            | 8/8 |
| Badar N, et al. (2021)         | yes | no  | yes | yes | no         | no         | yes | Not applicable | 4/5 |
| Hennessey MJ, et al. (2018)    | yes | yes | yes | yes | yes        | yes        | yes | yes            | 8/8 |
| Kumar, MS et al. (2021)        | yes | yes | yes | yes | yes        | yes        | yes | yes            | 8/8 |
| Azami NA, et al (2013)         | yes | no  | yes | yes | yes        | yes        | yes | yes            | 7/8 |
| Chattopadhyay, S.              | yes | no  | yes | yes | no         | no         | yes | Not            | 4/8 |

|                                |         |     |         |     |                |                |     |            |     |
|--------------------------------|---------|-----|---------|-----|----------------|----------------|-----|------------|-----|
| (2016)                         |         |     |         |     |                |                |     | applicable |     |
| de Andrade DC (2010)           | yes     | yes | yes     | yes | yes            | yes            | yes | yes        | 8/8 |
| Sissoko D (2008)               | yes     | yes | yes     | yes | yes            | yes            | yes | yes        | 8/8 |
| Sergon K. (2008)               | yes     | yes | yes     | yes | no             | unclear        | yes | unclear    | 5/8 |
| Frutuoso LCV. (2020)           | yes     | yes | yes     | yes | no             | unclear        | yes | unclear    | 5/8 |
| Gallian P. (2017)              | yes     | yes | yes     | yes | yes            | yes            | yes | yes        | 8/8 |
| Perissé ARS (2020)             | yes     | yes | yes     | yes | yes            | yes            | yes | yes        | 8/8 |
| Antonio VS (2018)<br>eu queria | no      | yes | yes     | yes | no             | no             | yes | yes        | 5/8 |
| Dias JP (2018)                 | yes     | yes | yes     | yes | no             | no             | yes | yes        | 6/8 |
| Cunha RV (2017)                | yes     | yes | yes     | yes | no             | no             | yes | yes        | 6/8 |
| Barreto FKA (2020)             | yes     | yes | yes     | yes | no             | no             | yes | yes        | 6/8 |
| Crosby L (2016)                | unclear | no  | unclear | yes | no             | no             | yes | unclear    | 2/8 |
| Murhekar M (2019)              | unclear | no  | unclear | yes | Not applicable | Not applicable | yes | unclear    | 2/8 |



|                                                           |     |     |     |     |     |     |     |     |     |     |     |
|-----------------------------------------------------------|-----|-----|-----|-----|-----|-----|-----|-----|-----|-----|-----|
| outcome                                                   |     |     |     |     |     |     |     |     |     |     |     |
| Measurement of effectiveness                              | no  |
|                                                           | no  | yes | yes | no  |
| Measurement and valuation of results based on preferences | no  | yes | yes | no  | no  | no  | no  | yes | no  | no  | no  |
| Estimating resources and costs                            | no  | yes | no  | no  | yes |
|                                                           | yes | yes | yes | yes | no  | yes | yes | yes | no  | yes | yes |
| Currency, price date and conversion                       | yes | no  | yes | yes |
| Choice of model                                           | yes | yes | yes | no  | no  | no  | yes | yes | yes | yes | yes |
| Assumptions                                               | yes | yes | yes | no  | no  | no  | yes | no  | yes | yes | yes |
| Analytical methods                                        | yes | yes | yes | no  | no  | yes | yes | yes | yes | yes | yes |
| Results                                                   |     |     |     |     |     |     |     |     |     |     |     |
| Study parameters                                          | yes |
| Incremental costs                                         | yes | yes | yes | yes | no  | no  | yes | yes | yes | yes | yes |

|                                                                      |     |     |     |     |     |     |     |     |     |     |     |
|----------------------------------------------------------------------|-----|-----|-----|-----|-----|-----|-----|-----|-----|-----|-----|
| and outcomes                                                         |     |     |     |     |     |     |     |     |     |     |     |
| Characterizing uncertainty                                           | yes | yes | no  |
|                                                                      | yes | yes | no  |
| Characterizing heterogeneity                                         | yes | yes | no  | no  | no  | no  | yes | no  | no  | no  | no  |
| Discussion                                                           |     |     |     |     |     |     |     |     |     |     |     |
| Study findings, limitations, generalizability, and current knowledge | yes | yes | yes | yes | yes | no  | yes | yes | yes | yes | yes |
| Sources of funding                                                   | no  | no  | no  | no  | yes | yes | yes | yes | yes | no  | yes |
| Conflicts of interest                                                | yes | no  | no  | yes | yes | yes | yes | yes | yes | no  | yes |
